# Supplementary material
Source: HighWire-hosted journal article supplement (http://bmjopen.bmj.com/highwire/filestream/202611/field_highwire_adjunct_files/0/ard.2011.200523_ds1.pdf)
Supplement: ard.2011.200523_ds1.pdf [file ard.2011.200523_ds1.pdf]

## Appendix 1: Sub-domains of Emerson's and Nabatchi's collaboration dynamics

| <b>Sub-domain</b>     | <b>Brief description</b> ( <i>paraphrased from Emerson &amp; Nabatchi (1)</i> )                                                                                                                                                                                                                            |
|-----------------------|------------------------------------------------------------------------------------------------------------------------------------------------------------------------------------------------------------------------------------------------------------------------------------------------------------|
| Principled engagement | An iterative process of interaction that enables people to collaborate across their respective institutional or sectoral boundaries to solve problems or create value together. Interactions are characterized by behavioral norms, such as fair and civil discourse and open and inclusive communication. |
| Shared motivation     | Joint recognition among participants that their ongoing investment of time and resources into the CGR is worthwhile for themselves and the organization or constituency they represent; this fosters participants' emerging identification with, and ultimately reinforces their dedication to, the CGR.   |
| Joint capacity        | A combination of essential elements – including procedural and institutional arrangements, leadership, knowledge, and resources – that enable CGR participants to accomplish their collective purpose as specified in their shared theory of change.                                                       |

1. Emerson K, Nabatchi T. Collaborative Governance Regimes [Internet]. Georgetown University Press; 2015 [cited 2017 Feb 26]. Available from: <https://muse.jhu.edu/book/44406>
